# Supplementary material
Source: HighWire-hosted journal article supplement (https://bmjopen.bmj.com/content/9/7/e030736)
Supplement: inline-supplementary-material-4 [file inline-supplementary-material-4.pdf]

# P:CES Study

PID: \_\_

Site (circle): SGH / MCH

Date: \_\_/\_\_/\_\_

## Demographics

|                                                                             |                                                       |                                                                                                                                                               |                                              |                                                                     |                                           |                          |
|-----------------------------------------------------------------------------|-------------------------------------------------------|---------------------------------------------------------------------------------------------------------------------------------------------------------------|----------------------------------------------|---------------------------------------------------------------------|-------------------------------------------|--------------------------|
| <b>4. Age</b> ___ (years)                                                   |                                                       | <b>5. Gender (circle)</b> MALE / FEMALE                                                                                                                       |                                              | <b>6. DOB:</b>                                                      |                                           |                          |
| <b>7. Date of Admission</b> __/__/____                                      |                                                       | <b>8. Marital Status:</b> Single <input type="checkbox"/> Widowed <input type="checkbox"/> Married <input type="checkbox"/> Divorced <input type="checkbox"/> |                                              |                                                                     |                                           |                          |
| <b>9a. Resuscitation Status:</b>                                            |                                                       | <b>9b. Date DNAR signed (if applicable)</b>                                                                                                                   |                                              |                                                                     |                                           |                          |
| <b>10. Ethnicity (circle)</b>                                               | <b>White</b>                                          | <b>Mixed/Multiple ethnic group</b>                                                                                                                            | <b>Asian/Asian British</b>                   | <b>Black / African / Caribbean / Black British</b>                  | <b>Other ethnic group</b>                 |                          |
|                                                                             | English / Welsh / Scottish / Northern Irish / British | White and Black Caribbean                                                                                                                                     | Indian                                       | African                                                             | Arab                                      |                          |
|                                                                             | Irish                                                 | White and Black African                                                                                                                                       | Pakistani                                    | Caribbean                                                           | Any other ethnic group, (please describe) |                          |
|                                                                             | Gypsy or Irish Traveller                              | White and Asian                                                                                                                                               | Bangladeshi                                  | Any other Black / African / Caribbean background, (please describe) |                                           |                          |
|                                                                             | Any other White background (please describe)          | Any other Mixed / Multiple ethnic background, (please describe)                                                                                               | Chinese                                      |                                                                     |                                           |                          |
|                                                                             |                                                       |                                                                                                                                                               | Any other Asian background (please describe) |                                                                     |                                           |                          |
| <b>11a. Reason for admission:</b>                                           |                                                       | <b>11b. Source of admission (e.g. a+e, gp referral, clinic)</b>                                                                                               |                                              |                                                                     |                                           |                          |
| <b>12. Primary Diagnoses:</b>                                               |                                                       |                                                                                                                                                               |                                              |                                                                     |                                           |                          |
| <b>13. Charlson Co-Morbidity Index (circle)</b>                             |                                                       |                                                                                                                                                               |                                              |                                                                     |                                           |                          |
| Myocardial infarct                                                          | 1                                                     | Hemiplegia                                                                                                                                                    | 2                                            |                                                                     |                                           |                          |
| Congestive heart failure                                                    | 1                                                     | Moderate or severe renal disease                                                                                                                              | 2                                            |                                                                     |                                           |                          |
| Peripheral vascular disease                                                 | 1                                                     | Diabetes with end organ damage                                                                                                                                | 2                                            |                                                                     |                                           |                          |
| Cerebrovascular disease                                                     | 1                                                     | Any tumour                                                                                                                                                    | 2                                            |                                                                     |                                           |                          |
| Dementia                                                                    | 1                                                     | Leukaemia                                                                                                                                                     | 2                                            |                                                                     |                                           |                          |
| Chronic pulmonary disease                                                   | 1                                                     | Lymphoma                                                                                                                                                      | 2                                            |                                                                     |                                           |                          |
| Connective tissue disease                                                   | 1                                                     | Moderate or severe liver disease                                                                                                                              | 3                                            |                                                                     |                                           |                          |
| Ulcer disease                                                               | 1                                                     | Metastatic solid tumour                                                                                                                                       | 6                                            |                                                                     |                                           |                          |
| Mid liver disease                                                           | 1                                                     | AIDS                                                                                                                                                          | 6                                            |                                                                     |                                           |                          |
| Diabetes                                                                    | 1                                                     | TOTAL                                                                                                                                                         |                                              |                                                                     |                                           |                          |
| <b>14. Medical Team prognosis of next 72 hours</b>                          |                                                       |                                                                                                                                                               |                                              |                                                                     |                                           |                          |
| "Do you think it is likely that this person will die in the next 72 hours?" |                                                       |                                                                                                                                                               |                                              |                                                                     |                                           |                          |
|                                                                             | Yes                                                   | No                                                                                                                                                            | Unsure                                       | Yes                                                                 | No                                        | Unsure                   |
| Nurse                                                                       | <input type="checkbox"/>                              | <input type="checkbox"/>                                                                                                                                      | <input type="checkbox"/>                     | Doctor                                                              | <input type="checkbox"/>                  | <input type="checkbox"/> |
|                                                                             |                                                       |                                                                                                                                                               |                                              | Palliative Care Specialist                                          | <input type="checkbox"/>                  | <input type="checkbox"/> |
| Percentage certainty:                                                       |                                                       |                                                                                                                                                               |                                              |                                                                     |                                           |                          |
| Job title(s) of person/people stating prognosis:                            |                                                       |                                                                                                                                                               |                                              |                                                                     |                                           |                          |

# P:CES Study

PID: \_\_

Site (circle): SGH / MCH

Date: \_\_/\_\_/\_\_

## 15. Patient Symptoms

Please mark the following symptoms for the patient.

This information will be available from the medical notes, medical team, or from seeing the patient.

| a. Respiration                   |        |    |                                                   | Yes                      | No                       |
|----------------------------------|--------|----|---------------------------------------------------|--------------------------|--------------------------|
| Complaint of shortness of breath | Yes    | No | N/A                                               | <input type="checkbox"/> | <input type="checkbox"/> |
| 0 <sup>2</sup> sats              | Level: |    | <input type="checkbox"/>                          | <input type="checkbox"/> | <input type="checkbox"/> |
|                                  |        |    | Noisy respiratory secretions                      | <input type="checkbox"/> | <input type="checkbox"/> |
|                                  |        |    | Cheyne-stokes respiration                         | <input type="checkbox"/> | <input type="checkbox"/> |
|                                  |        |    | Abdominal Swelling                                | <input type="checkbox"/> | <input type="checkbox"/> |
|                                  |        |    | Respiration with mandibular movement (jaw moving) | <input type="checkbox"/> | <input type="checkbox"/> |

| b. Blood Circulation                   |        |    |                | Yes                      | No                       |
|----------------------------------------|--------|----|----------------|--------------------------|--------------------------|
| Heart Rate                             | Pulse: |    | N/A            | <input type="checkbox"/> | <input type="checkbox"/> |
| Blood Pressure                         | BP:    |    | Change in skin | <input type="checkbox"/> | <input type="checkbox"/> |
| Fever                                  | Temp:  |    | Colour         | <input type="checkbox"/> | <input type="checkbox"/> |
|                                        |        |    | specify        |                          |                          |
| Pulselessness of radial artery         | YES    | NO | N/A            | <input type="checkbox"/> | <input type="checkbox"/> |
| Peripheral Cyanosis (blue extremities) |        |    | Temperature    | <input type="checkbox"/> | <input type="checkbox"/> |
| Pointed nose                           |        |    | specify        |                          |                          |
|                                        |        |    | Moisture       | <input type="checkbox"/> | <input type="checkbox"/> |
|                                        |        |    | specify        |                          |                          |

| c. Physical Condition                                       |                          |                          |                             | Skin Integrity           |                          |
|-------------------------------------------------------------|--------------------------|--------------------------|-----------------------------|--------------------------|--------------------------|
| In consciousness:                                           | Yes                      | No                       | N/A                         | Yes                      | No                       |
| Extreme tiredness                                           | <input type="checkbox"/> | <input type="checkbox"/> | <input type="checkbox"/>    | <input type="checkbox"/> | <input type="checkbox"/> |
| Insomnia                                                    | <input type="checkbox"/> | <input type="checkbox"/> | <input type="checkbox"/>    | <input type="checkbox"/> | <input type="checkbox"/> |
| Surges of energy                                            | <input type="checkbox"/> | <input type="checkbox"/> | <input type="checkbox"/>    | <input type="checkbox"/> | <input type="checkbox"/> |
| Rapid degradation of general condition in the last 24 hours | <input type="checkbox"/> | <input type="checkbox"/> |                             | <input type="checkbox"/> | <input type="checkbox"/> |
|                                                             |                          |                          | Infected wounds             |                          |                          |
|                                                             |                          |                          | Pressure Sores              |                          |                          |
|                                                             |                          |                          | Grade of Sore:              |                          |                          |
|                                                             |                          |                          | Clinical signs of infection |                          |                          |
|                                                             |                          |                          | Possible source?            |                          |                          |

| d. Excretion                        |                          |                          |                                   | Yes                      | No                       | N/A                      |
|-------------------------------------|--------------------------|--------------------------|-----------------------------------|--------------------------|--------------------------|--------------------------|
| Is there a catheter in situ         | Yes                      | No                       | N/A                               | <input type="checkbox"/> | <input type="checkbox"/> | <input type="checkbox"/> |
| Is there a stoma in situ            | <input type="checkbox"/> | <input type="checkbox"/> | <input type="checkbox"/>          | <input type="checkbox"/> | <input type="checkbox"/> | <input type="checkbox"/> |
| Urinary incontinence, if applicable | <input type="checkbox"/> | <input type="checkbox"/> | <input type="checkbox"/>          | <input type="checkbox"/> | <input type="checkbox"/> | <input type="checkbox"/> |
| Faecal incontinence, if applicable  | <input type="checkbox"/> | <input type="checkbox"/> | <input type="checkbox"/>          | <input type="checkbox"/> | <input type="checkbox"/> | <input type="checkbox"/> |
| Concentrated urine                  | <input type="checkbox"/> | <input type="checkbox"/> | <input type="checkbox"/>          | <input type="checkbox"/> | <input type="checkbox"/> | <input type="checkbox"/> |
|                                     |                          |                          | Vomiting                          |                          |                          |                          |
|                                     |                          |                          | Altered defecation - diarrhoea    |                          |                          |                          |
|                                     |                          |                          | Altered defecation - constipation |                          |                          |                          |
|                                     |                          |                          | Decreased production of urine     |                          |                          |                          |
|                                     |                          |                          | amount in last 24hrs              |                          |                          |                          |

| e. Oral Intake     |                          |                          |                              | Yes                      | No                       | N/A                      |
|--------------------|--------------------------|--------------------------|------------------------------|--------------------------|--------------------------|--------------------------|
| Decreased eating   | Yes                      | No                       | N/A                          | <input type="checkbox"/> | <input type="checkbox"/> | <input type="checkbox"/> |
| Decreased drinking | <input type="checkbox"/> | <input type="checkbox"/> | <input type="checkbox"/>     | <input type="checkbox"/> | <input type="checkbox"/> | <input type="checkbox"/> |
|                    |                          |                          | If the patient is conscious: | <input type="checkbox"/> | <input type="checkbox"/> | <input type="checkbox"/> |
|                    |                          |                          | Refusal of food              | <input type="checkbox"/> | <input type="checkbox"/> | <input type="checkbox"/> |
|                    |                          |                          | Swallowing Difficulty        | <input type="checkbox"/> | <input type="checkbox"/> | <input type="checkbox"/> |
|                    |                          |                          | Loss of appetite             | <input type="checkbox"/> | <input type="checkbox"/> | <input type="checkbox"/> |

| f. Pain                              |                          |                          |                                                   | Yes                      | No                       | N/A                      |
|--------------------------------------|--------------------------|--------------------------|---------------------------------------------------|--------------------------|--------------------------|--------------------------|
| In consciousness:                    | Yes                      | No                       | N/A                                               | <input type="checkbox"/> | <input type="checkbox"/> | <input type="checkbox"/> |
| Patient complains of pain            | <input type="checkbox"/> | <input type="checkbox"/> | <input type="checkbox"/>                          | <input type="checkbox"/> | <input type="checkbox"/> | <input type="checkbox"/> |
| Do you think the patient has pain?   | <input type="checkbox"/> | <input type="checkbox"/> | <input type="checkbox"/>                          | <input type="checkbox"/> | <input type="checkbox"/> | <input type="checkbox"/> |
| Pain is less responsive to treatment | <input type="checkbox"/> | <input type="checkbox"/> | <input type="checkbox"/>                          | <input type="checkbox"/> | <input type="checkbox"/> | <input type="checkbox"/> |
|                                      |                          |                          | Circle the pain level patient is reporting:       |                          |                          |                          |
|                                      |                          |                          | mild moderate severe                              |                          |                          |                          |
|                                      |                          |                          | Circle the pain level you feel the patient is in: |                          |                          |                          |
|                                      |                          |                          | mild moderate severe                              |                          |                          |                          |

## P:CES Study

PID: \_\_

Site (circle): SGH / MCH

Date: \_\_/\_\_/\_\_

**g. Consciousness / Psychological Condition / Spiritual**

**Richmond Agitation Sedation Scale (RASS)**

Please circle which category currently represents the patient

|    |                   |                                                                                               |                      |
|----|-------------------|-----------------------------------------------------------------------------------------------|----------------------|
| +4 | Combative         | Overtly combative, violent, immediate danger to staff                                         |                      |
| +3 | Very Agitated     | Pulls or removes tube(s) or catheter(s); aggressive                                           |                      |
| +2 | Agitated          | Frequent non-purposeful movement, fights ventilator                                           |                      |
| +1 | Restless          | Anxious but movements not aggressive vigorous                                                 |                      |
| 0  | Alert and Calm    |                                                                                               |                      |
| -1 | Drowsy            | Not fully alert, but has sustained awakening (eye-opening/eye contact) to voice (>10 seconds) | Verbal Stimulation   |
| -2 | Light Sedation    | Briefly awakens with eye contact to voice (<10 seconds)                                       |                      |
| -3 | Moderate Sedation | Movement or eye opening to voice (but no eye contact)                                         |                      |
| -4 | Deep sedation     | No response to voice, but movement or eye opening to physical stimulation                     | Physical Stimulation |
| -5 | Unarousable       | No response to voice or physical stimulation                                                  |                      |

How to complete the RASS:

- 1. Observe patient**
  - a. Patient is alert, restless, or agitated. (score 0 to +4)
- 2. If not alert, state patient's name and say to open eyes and look at speaker.**
  - b. Patient awakens with sustained eye opening and eye contact. (score -1)
  - c. Patient awakens with eye opening and eye contact, but not sustained. (score -2)
  - d. Patient has any movement in response to voice but no eye contact. (score -3)
  3. When no response to verbal stimulation, physically stimulate patient by shaking shoulder and/or rubbing sternum.
  - e. Patient has any movement to physical stimulation. (score -4)
  - f. Patient has no response to any stimulation. (score -5)

|              | Yes                      | No                       | N/A                      |                                     | Yes                      | No                       | N/A                      |
|--------------|--------------------------|--------------------------|--------------------------|-------------------------------------|--------------------------|--------------------------|--------------------------|
| Confusion    | <input type="checkbox"/> | <input type="checkbox"/> | <input type="checkbox"/> | Recoil behaviour (withdrawn)        | <input type="checkbox"/> | <input type="checkbox"/> | <input type="checkbox"/> |
| Delirium     | <input type="checkbox"/> | <input type="checkbox"/> | <input type="checkbox"/> | Acceptance of death                 | <input type="checkbox"/> | <input type="checkbox"/> | <input type="checkbox"/> |
| Anxiety/fear | <input type="checkbox"/> | <input type="checkbox"/> | <input type="checkbox"/> | Patient is saying goodbye to family | <input type="checkbox"/> | <input type="checkbox"/> | <input type="checkbox"/> |

**16. Narrative description of patient's overall condition and general presentation**

## P:CES Study

PID: \_\_

Site (circle): SGH / MCH

Date: \_\_/\_\_/\_\_

### 17. Palliative Performance Scale

Please circle an option from each column which represents the patients current ability

| Ambulation           | Activity & Evidence of Disease                                 | Self-Care                           | Intake            | Conscious level                    |
|----------------------|----------------------------------------------------------------|-------------------------------------|-------------------|------------------------------------|
| Full                 | Normal activity & work<br>No evidence of disease               | Full                                | Normal            | Full                               |
| Full                 | Normal activity & work<br>Some evidence of disease             | Full                                | Normal            | Full                               |
| Full                 | Normal activity <i>with</i> Effort<br>Some evidence of disease | Full                                | Normal or reduced | Full                               |
| Reduced              | Unable Normal Job/Work<br>Some disease                         | Full                                | Normal or reduced | Full                               |
| Reduced              | Unable hobby/house work<br>Significant disease                 | Occasional assistance<br>necessary  | Normal or reduced | Full or<br>confusion               |
| Mainly sit/lie       | Unable to do any work<br>Extensive disease                     | Considerable<br>assistance required | Normal or reduced | Full or<br>confusion               |
| Mainly in bed        | Unable to do any activity<br>Extensive disease                 | Mainly assistance                   | Normal or reduced | Full or Drowsy<br>+/- Confusion    |
| Totally Bed<br>Bound | Unable to do any activity<br>Extensive disease                 | Total Care                          | Reduced           | Full or Drowsy<br>+/- Confusion    |
| Totally Bed<br>Bound | Unable to do any activity<br>Extensive disease                 | Total Care                          | Minimal to sips   | Full or Drowsy<br>+/- Confusion    |
| Totally Bed<br>Bound | Unable to do any activity<br>Extensive disease                 | Total Care                          | Mouth care only   | Drowsy or<br>coma +/-<br>Confusion |
| Death                | -                                                              | -                                   | -                 | -                                  |

### 18. Other

Please include any other information you feel may be relevant to the patient's condition e.g. family's intuitive feelings if offered, sudden change in the patient's condition.

### 19. Information about patient on admission

Case Report Form

v1 19/06/2015

**P:CES Study**

**PID:** \_\_

**Site** (*circle*): **SGH / MCH**

**Date:** \_\_/\_\_/\_\_

*e.g. functional ability, treatments, number of previous admissions*
